# Supplementary material for: Integrated Transcriptome and Proteome Analysis Revealed the Regulatory Mechanism of Hypocotyl Elongation in Pakchoi
Source: MDPI journal article supplement (doi:10.3390/ijms241813808), 2023-09-07
Supplement: s1 [file s1]

## Supplementary data

**Table S1.** Top 20 KEGG pathways of DEGs

| Pathway                                     | Ko _ ID | DEGs number | %    |
|---------------------------------------------|---------|-------------|------|
| Plant-pathogen interaction                  | ko04626 | 152         | 9.07 |
| Plant hormone signal transduction           | ko04075 | 143         | 8.53 |
| Carbon metabolism                           | ko01200 | 112         | 6.68 |
| Starch and sucrose metabolism               | ko00500 | 80          | 4.77 |
| Photosynthesis                              | ko00195 | 80          | 4.77 |
| Phenylpropanoid biosynthesis                | ko00940 | 76          | 4.53 |
| Biosynthesis of amino acids                 | ko01230 | 69          | 4.12 |
| Carbon fixation in photosynthetic organisms | ko00710 | 60          | 3.58 |
| Glyoxylate and dicarboxylate metabolism     | ko00630 | 58          | 3.46 |
| Protein processing in endoplasmic reticulum | ko04141 | 58          | 3.46 |
| Ribosome                                    | ko03010 | 55          | 3.28 |
| Pentose and glucuronate interconversions    | ko00040 | 47          | 2.80 |
| Glycolysis / Gluconeogenesis                | ko00010 | 43          | 2.57 |
| Amino sugar and nucleotide sugar metabolism | ko00520 | 42          | 2.51 |
| Endocytosis                                 | ko04144 | 41          | 2.45 |
| Spliceosome                                 | ko03040 | 41          | 2.45 |
| RNA transport                               | ko03013 | 39          | 2.33 |
| ABC transporters                            | ko02010 | 39          | 2.33 |
| Glycerolipid metabolism                     | ko00561 | 38          | 2.27 |
| Cysteine and methionine metabolism          | ko00270 | 35          | 2.09 |

**Table S2.** The expression of 6 DEGs in RNA-seq

| Gene ID              | FPKM (WT) | FPKM    | FDR        | FC     | Regulated |
|----------------------|-----------|---------|------------|--------|-----------|
| <i>BraC01g000200</i> | 21.0856   | 3.9336  | 3.7340E-09 | -      | down      |
| <i>BraC01g040730</i> | 6.1388    | 0.2226  | 2.8372E-20 | -      | down      |
| <i>BraC01g032200</i> | 0.1782    | 0.8921  | 1.3800E-05 | 1.9673 | up        |
| <i>BraC02g002040</i> | 0.6190    | 14.4296 | 5.3766E-48 | 4.2434 | up        |
| <i>BraC05g045610</i> | 0.2988    | 1.5292  | 1.7938E-06 | 2.0398 | up        |
| <i>BraC06g009990</i> | 10.5523   | 0.2093  | 4.7462E-31 | -      | down      |

**Table S3.** qRT-PCR primer sequence

| Genes ID             | Primer discription | Primer sequence (5'-3')  |
|----------------------|--------------------|--------------------------|
| <i>BraC02g002040</i> | Forward            | GTTGTTCATGAGTATCTGGTGG   |
|                      | Reverse            | AAGTATTCATGTCGCCTCTCC    |
| <i>BraC01g032200</i> | Forward            | TATCCATGGAAGTAGAGTTTCTGG |
|                      | Reverse            | AAAGCTGTAGACATCAGAGGG    |
| <i>BraC05g045610</i> | Forward            | GTATAGTGTCAGAGTTCCTTCCAC |
|                      | Reverse            | GTCAGCTACCTTAACAGTCCA    |
| <i>BraC01g000200</i> | Forward            | GACGGAGAACACGACATTGAC    |
|                      | Reverse            | TCCCGACAAGAACATGATTCC    |
| <i>BraC01g040730</i> | Forward            | CTCTTCAGAGCAAGTTCTTTGAG  |
|                      | Reverse            | GACCAAGCTTAGGCTTCTCC     |
| <i>BraC06g009990</i> | Forward            | TGAAGGATTAAGAGACATGAGGG  |
|                      | Reverse            | GAGATACGACTCGTACACCT     |
| <i>GAPDH</i>         | Forward            | GACTGGAGAGGTGGAAGAGCC    |
|                      | Reverse            | ACTGAAACATCAACGGTGGGA    |

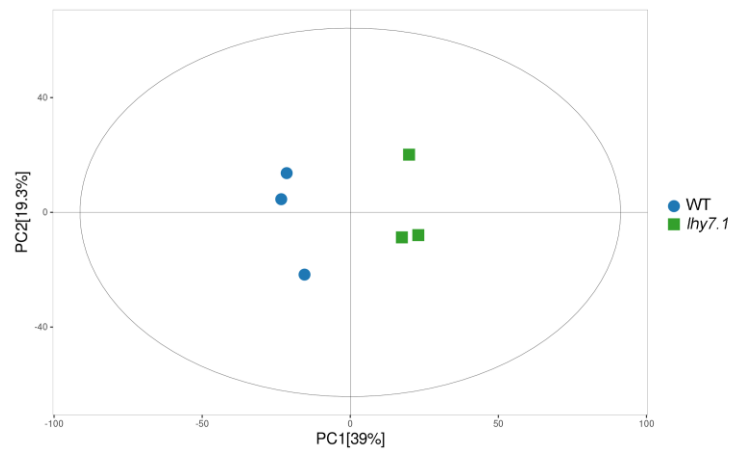**Figure S1.** PCA of proteome
